# Supplementary material for: An Integrated Genome-Wide Systems Genetics Screen for Breast Cancer Metastasis Susceptibility Genes
Source: PLoS Genet. 2016 Apr 13;12(4):e1005989. doi: 10.1371/journal.pgen.1005989 (PMC4830524; doi:10.1371/journal.pgen.1005989)
Supplement: S4 Table — (XLS) [file pgen.1005989.s011.xls]

## Sheet: Sheet1
	Supplemental table 4: Top canonical pathways identified by Ingenuity Pathway Analysis
	DMFS genes		Metastasis Associated Genes
	Pathway	P value	Pathway	P value
	Antigen Presentation Pathway	4.68e-08	Type II Diabetes Mellitus Signaling	0.000234
	Estrogen-mediated S-phase Entry	7.36e-06	Role of Macrophages, Fibroblasts and Endothelial Cells in Rheumatoid Arthritis	0.000351
	Cyclins and Cell Cycle Regulation	0.000245	Tetrahydrofolate Salvage from 5,10-methenyltetrahydrofolate	0.000404
	ATM Signaling	1.47ee-03	Role of Osteoblasts,Osteoclasts and Chondrocytes in Rheumatoid Arthritis	0.000723
	PTEN Signaling	0.00215	Factors Promoting Cardiogenesis in Vertebrates	0.0014
